# Supplementary material
Source: PubMed Central journal article supplement (PMC516548)

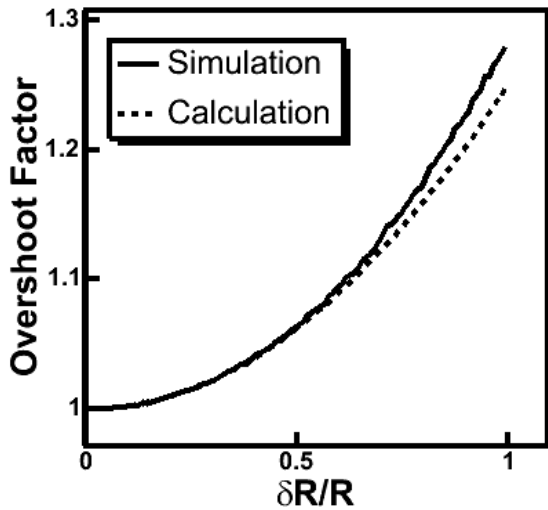

Supplement: pnas_101_36_13204__2.pdf [file pnas_101_36_13204__2.pdf]

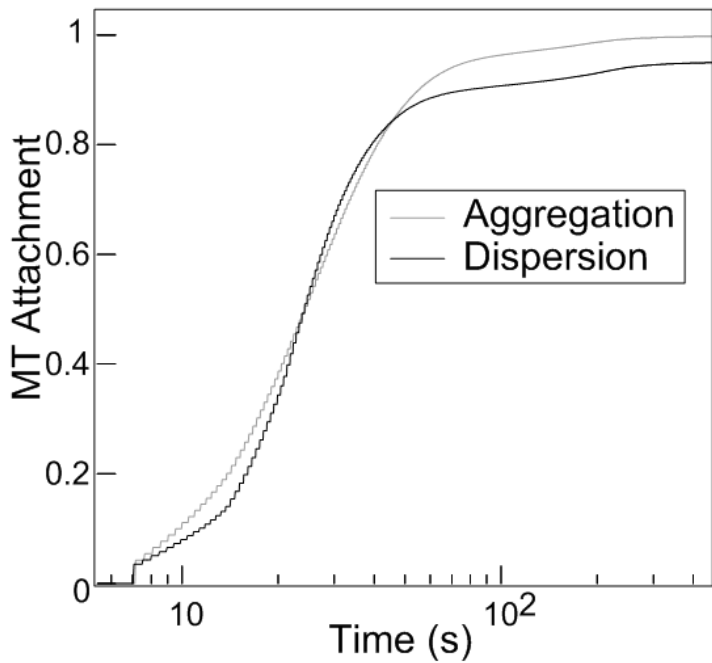

Supplement: pnas_101_36_13204__5.pdf [file pnas_101_36_13204__5.pdf]
